# Supplementary material for: Geostatistical interpolation by Quantile Kriging
Source: Copernicus journal article supplement (doi:10.5194/hess-2018-276), 2018-05-30
Supplement: Supplementary file [file hess-2018-276-AC3-supplement.pdf]

# Responses on the comments of Referee 2 on the submitted manuscript “Geostatistical interpolation by Quantile Kriging “hess-2018-276

We thank the reviewer for the valuable comments. Instead of going into detail with the individual points we give a description of the model, which could explain the questionable details.

## Description of the Process

Obviously, there is an underlying process assumption behind the model. A sketchy description is as follows:

Let  $Y_0(x, t)$  be independent (for each different  $t$ ) normal stationary spatial fields with  $E[Y_0] = 0$  and  $D^2(Y_0) = 1$  for each  $t$ .

Let:

$$Y_1(x, t) = Y_0(x, t) + M(t) \quad (1)$$

where  $M(t)$  is a process (in time) with zero mean. We may assume that the distribution of  $M(t)$  is normal. In this case each  $x$   $Y_1(x, t)$  is normally distributed with  $N(0, d)$ . Further for each  $t$  the distribution of  $Y_1(x, t)$  is  $N(M(t), 1)$ . Now  $Y_2$  is defined as:

$$Y_2(x, t) = \Phi_{0,d}(Y_1(x, t)) \quad (2)$$

where  $\Phi_{0,d}$  is the distribution function of  $N(0, d)$ . By definition  $0 \leq Y_2(x, t) \leq 1$

The rainfall is then *generated* as:

$$Z(x, t) = F_x^{-1}(Y_2(x, t)) \quad (3)$$

where  $F_x$  is the distribution function of rainfall at location  $x$ . The  $F_x$ s can be different due to topography and other influencing factors. These  $F_x$ -s can be interpolated - example see also in Mosthaf and Bardossy (2017).

We use  $Y_2(x, t)$  for each  $t$  and assume that it follows a beta distribution. In fact its distribution depends on  $M(t)$ . If  $M(t) = 0$  for all  $t$ -s then monthly rainfall is fully characterised by independent realizations over space. In this case the distribution of  $Y_2$  is uniform for each  $t$ .

This however is not the case with observed data. The reason is that wet and dry conditions occur simultaneously over the whole area. This is controlled by  $M(t)$ . One can take  $M(t)$  for example as independent random variables or as an ARMA process. If  $M(t) \neq 0$  then the distribution of  $Y_2(x, t)$  for this  $t$  is not uniform. The reason for assuming it as beta was due to the fact that beta distributions are very flexible and can well describe distributions in  $[0, 1]$ . The exact form of the corresponding distribution would be something like:

$$G_t(v) = \Phi_{0,1} \left( \Phi_{M(t),1}^{-1}(v) \right)$$

However the use of this would require the exact knowledge of  $M(t)$  for each  $t$ . We decided to use a simple beta distribution instead.

The introduction of  $M(t)$  is reasonable as it explains the difference between the correlation between stations and the spatial correlation calculated using a variogram type approach for a given time. The later correlations are usually lower (smaller ranges) which are increased by the common large scale weather described with  $M(t)$ .

In our procedure we start with  $Z(x, t)$ , estimate and interpolate  $F_x$ . The calculate  $Y_2$  for the observation locations. We interpolate  $Y_2$  and come back to  $Z(x, t)$ .

Spatial variograms are calculated for  $Y_2$  for each  $t$ , and  $Y_2$  is stationary in space. Non-stationarity and non-Gaussian distributions occur only for  $Z$ . That is the reason why we concentrate on  $Y_2$ .

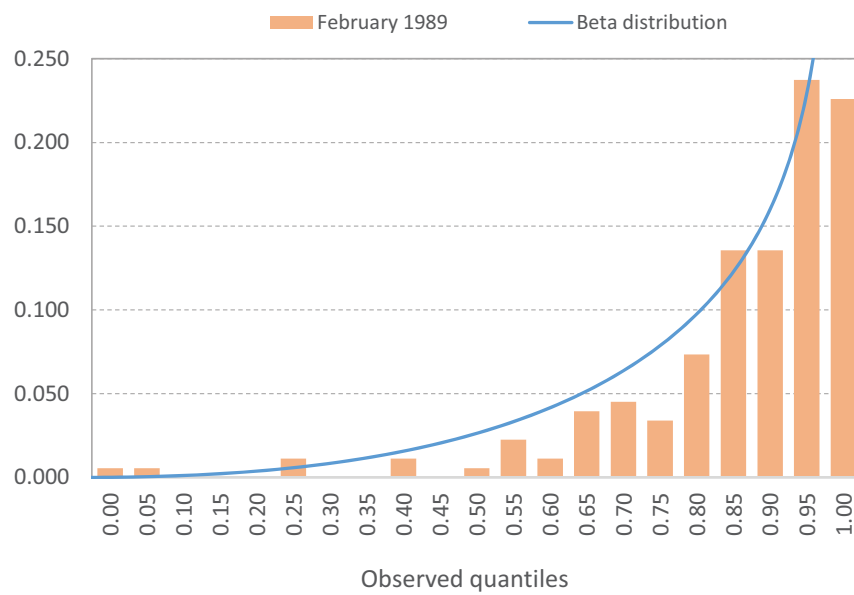

Abbildung 1: Example of the histogram of the observed quantiles in February 1989, along with the fitted Beta-distribution

Reference:

Mosthaf, T. and A. Bárdossy, Regionalizing non-parametric precipitation amount models on different temporal scales, *Hydrology and Earth System Sciences*, **21** , 2463-2481, 2017
